# Supplementary material for: The effectiveness of malaria camps as part of the malaria control program in Odisha, India
Source: PubMed Central journal article supplement (PMC10754896; doi:10.1038/s41598-023-46220-x), 2023-12-28
Supplement: 41598_2023_46220_MOESM1_ESM.pdf [file 41598_2023_46220_MOESM1_ESM.pdf]

## Supplemental files

The effectiveness of malaria camps as part of the malaria control program in Odisha, India

Danielle C. Ompad<sup>1\*</sup>, Timir K. Padhan.<sup>2^</sup>, Anne Kessler<sup>3^</sup>, Yesim Tozan<sup>1</sup>, Abbey M. Jones<sup>1</sup>, Anna Maria van Eijk<sup>3</sup>, Steven A. Sullivan<sup>3</sup>, Mohammed A. Haque<sup>2</sup>, Madan Mohan Pradhan<sup>4¶</sup>, Sanjib Mohanty<sup>2¶</sup>, Jane M. Carlton<sup>1,3¶</sup> and Praveen K. Sahu<sup>2¶\*</sup>

<sup>1</sup>School of Global Public Health, New York University, New York, NY, 10003, USA

<sup>2</sup>Department of Molecular Biology & Infectious Diseases, Community Welfare Society Hospital, Rourkela, Odisha, 769042, India

<sup>3</sup>Center for Genomics and Systems Biology, Department of Biology, New York University, New York, NY, 10003, USA

<sup>4</sup>Department of Health & Family Welfare, State Vector Borne Disease Control Programme, Bhubaneswar, Odisha, 751001, India

figure

<sup>^</sup>TKP and AK are joint second authors

<sup>¶</sup>PKS, JMC, SM, and MMP are joint last authors

<sup>\*</sup>corresponding authors

## Figure legends

**Supplemental Figure 1. Timeline of the interventions and surveys (enrolments) undertaken in the study villages.** Malaria Camp (MC) Interventions (Green) timeline and enrolment surveys (Orange) undertaken during Aug 2019 to Nov 2020 during the Covid-19 pandemic. BL: Baseline, FU1: Follow up 1, FU2: Follow up 2, FU3: Follow up 3. The timeline of village-wise enrolments is shown in the table: village-wise enrolments at baseline, FU1, FU2 and FU3 surveys. Enrolments were halted midway in FU1 (dark grey highlights) due to Covid 19 pandemic restrictions (designated ^) and impacted significantly in FU2 (light grey highlights) due to apprehension of being involved in the study by participants.

**Supplemental Table 1.** Demographic characteristics and *Plasmodium* outcomes for individuals retained in the study versus those lost-to-follow-up.

| Variable                                                    | Lost-to-follow-up     |                       | p-value <sup>1</sup> |
|-------------------------------------------------------------|-----------------------|-----------------------|----------------------|
|                                                             | No<br>n=1999<br>n (%) | Yes<br>n=464<br>n (%) |                      |
| <b>Study arm</b>                                            |                       |                       |                      |
| Arm A (New MC)                                              | 807 (40.4)            | 194 (41.8)            | 0.425                |
| Arm B (Delayed MC)                                          | 826 (41.3)            | 197 (42.5)            |                      |
| Arm C (Old MC)                                              | 366 (18.3)            | 73 (15.7)             |                      |
| <b>Age categories</b>                                       |                       |                       |                      |
| ≤5                                                          | 251 (12.6)            | 97 (20.9)             | <0.001               |
| 6-17                                                        | 569 (28.5)            | 156 (33.6)            |                      |
| 18-34                                                       | 498 (24.9)            | 83 (17.9)             |                      |
| ≥35                                                         | 681 (34.1)            | 128 (27.6)            |                      |
| <b>Sex</b>                                                  |                       |                       |                      |
| Male                                                        | 858 (42.9)            | 221 (47.6)            | 0.093 <sup>2</sup>   |
| Female                                                      | 1139 (57.0)           | 242 (52.2)            |                      |
| Missing                                                     | 2 (0.1)               | 1 (0.2)               |                      |
| <b>Educational attainment</b>                               |                       |                       |                      |
| No schooling/ less than primary                             | 969 (48.5)            | 245 (52.8)            | <0.001 <sup>2</sup>  |
| Primary                                                     | 451 (22.6)            | 110 (23.7)            |                      |
| Middle, secondary, or matric                                | 447 (22.4)            | 100 (21.6)            |                      |
| Higher secondary or more                                    | 131 (6.6)             | 9 (1.9)               |                      |
| Missing                                                     | 1 (0.1)               | 0 (0.0)               |                      |
| <b>Occupation</b>                                           |                       |                       |                      |
| Farmer or agricultural laborer                              | 105 (5.3)             | 33 (7.1)              | <0.001               |
| Other employment or trade                                   | 384 (19.2)            | 73 (15.7)             |                      |
| Housewife                                                   | 614 (30.7)            | 95 (20.5)             |                      |
| Student                                                     | 684 (34.2)            | 174 (37.5)            |                      |
| Child, not in school                                        | 162 (8.1)             | 74 (15.9)             |                      |
| None                                                        | 49 (2.5)              | 14 (3.0)              |                      |
| Missing                                                     | 1 (0.1)               | 1 (0.2)               |                      |
| <b>Any malaria by RDT</b>                                   |                       |                       |                      |
| No                                                          | 1,981 (99.1)          | 425 (91.6)            | <0.001 <sup>2</sup>  |
| Yes                                                         | 11 (0.6)              | 36 (7.8)              |                      |
| Missing                                                     | 7 (0.4)               | 3 (0.6)               |                      |
| <b>Any <i>Plasmodium</i> infection by PCR</b>               |                       |                       |                      |
| No                                                          | 1,924 (96.2)          | 264 (56.9)            | <0.001               |
| Yes                                                         | 50 (2.5)              | 189 (40.7)            |                      |
| Missing                                                     | 25 (1.3)              | 11 (2.4)              |                      |
| <b>Any <i>Plasmodium</i> infection by RDT or PCR</b>        |                       |                       |                      |
| No                                                          | 1,949 (97.5)          | 274 (59.1)            | <0.001               |
| Yes                                                         | 50 (2.5)              | 190 (40.9)            |                      |
| <b>Asymptomatic <i>Plasmodium</i> infection<sup>3</sup></b> |                       |                       |                      |
| No                                                          | 30 (60.0)             | 93 (48.9)             | 0.164                |
| Yes                                                         | 20 (40.0)             | 97 (51.1)             |                      |
| <b>Subpatent <i>Plasmodium</i> infection<sup>4</sup></b>    |                       |                       |                      |
| No                                                          | 11 (22.0)             | 36 (18.9)             | 0.754 <sup>2</sup>   |
| Yes                                                         | 39 (78.0)             | 153 (80.5)            |                      |
| Missing                                                     | 0 (0.0)               | 1 (0.5)               |                      |

MC = malaria camp; RDT = rapid diagnostic test; PCR = polymerase chain reaction

<sup>1</sup>  $\chi^2$  p-value, unless otherwise noted

<sup>2</sup> Fishers exact test

<sup>3</sup> Asymptomatic *Plasmodium* infections are RDT+ or PCR+ and fever-

<sup>4</sup> Subpatent *Plasmodium* infections are RDT- and PCR+

Supplemental figure 1.

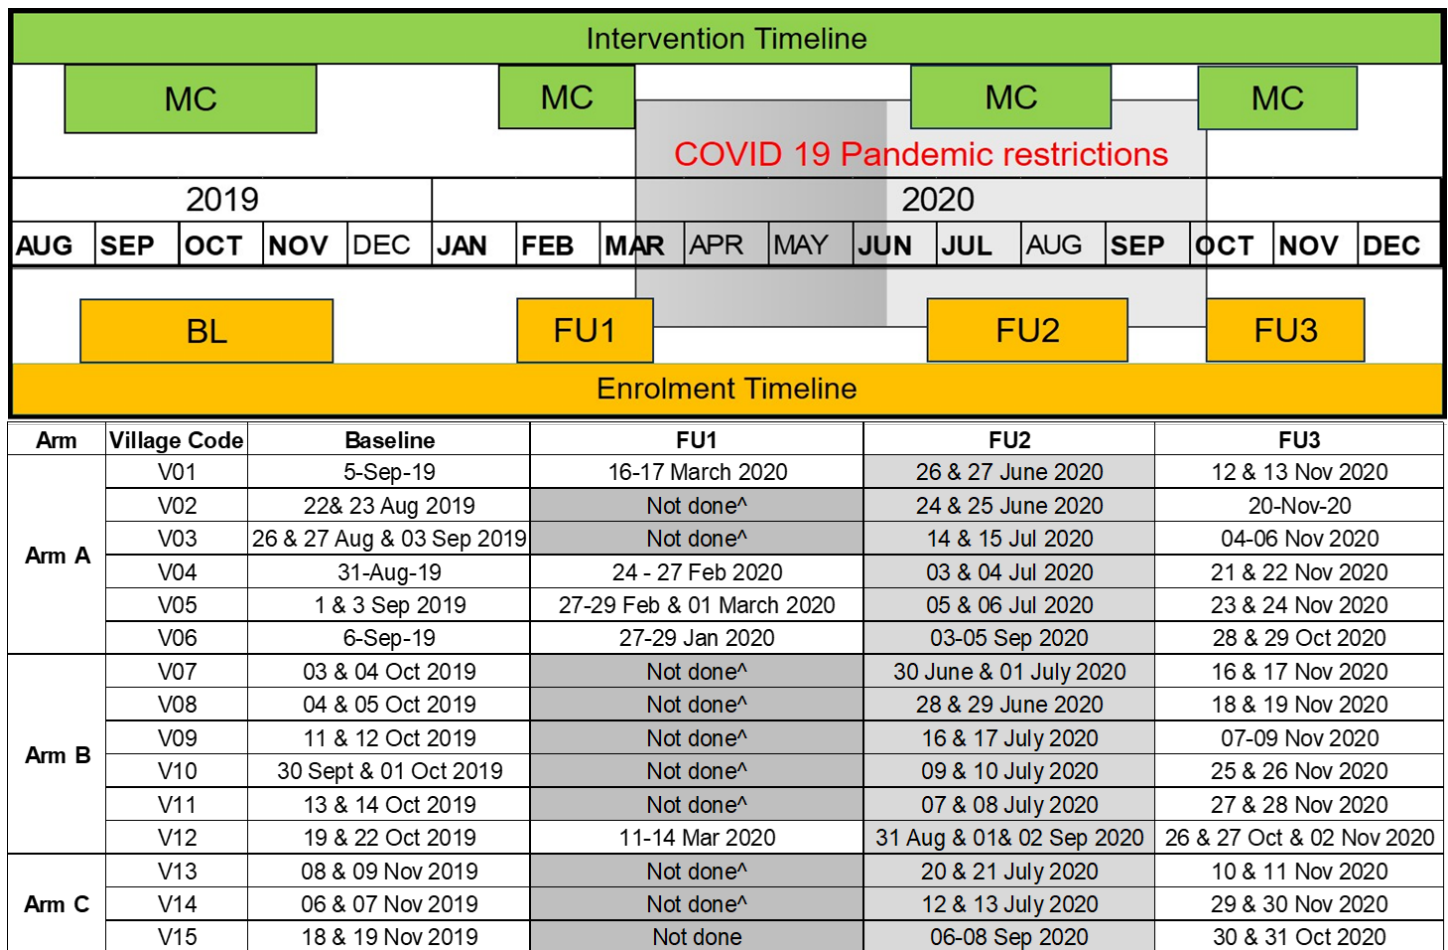

**Supplemental Table 2.** Village-specific *Plasmodium* outcomes at baseline and follow-up.

| Study Arm           | Village Number | Prevalence (%) of Plasmodium infection detected by PCR |             |
|---------------------|----------------|--------------------------------------------------------|-------------|
|                     |                | Baseline                                               | Follow-up 3 |
| Arm A (New MC)      | 1              | 20.51                                                  | 3.12        |
|                     | 2              | 24.49                                                  | 0.00        |
|                     | 3              | 20.82                                                  | 7.41        |
|                     | 4              | 10.09                                                  | 1.13        |
|                     | 5              | 8.27                                                   | 0.00        |
|                     | 6              | 11.29                                                  | 0.00        |
|                     | 7              | 22.58                                                  | 0.00        |
| Arm B (Delayed MC)  | 8              | 1.48                                                   | 0.00        |
|                     | 9              | 17.01                                                  | 18.71       |
|                     | 10             | 0.75                                                   | 0.00        |
|                     | 11             | 1.55                                                   | 0.00        |
|                     | 12             | 6.33                                                   | 0.00        |
| Arm C (Previous MC) | 13             | 9.38                                                   | 3.77        |
|                     | 14             | 0.00                                                   | 0.00        |
|                     | 15             | 3.16                                                   | 0.00        |
